# Supplementary material for: Cationic polyurethane from CO2-polyol as an effective barrier binder for polyaniline-based metal anti-corrosion materials
Source: Royal Society of Chemistry journal article supplement (doi:10.1039/d0py01757d), 2021-01-01
Supplement: d0py01757d1.pdf [file d0py01757d1.pdf]

Electronic Supplementary Information

## **Cationic Polyurethane from CO<sub>2</sub>-polyol as Effective Barrier Binder to Polyaniline-based Metal Anti-corrosion Material**

Chenyang Zou,<sup>a,b</sup> Qinghai Zhou,<sup>a,b</sup> Xianhong Wang,<sup>\*a,b</sup> Hongming Zhang,<sup>a</sup> and Fosong Wang<sup>a</sup>

<sup>a</sup> Key Laboratory of Polymer Eco-materials, Changchun Institute of Applied Chemistry, Chinese Academy of Sciences, Changchun 130022, People's Republic of China. E-mail: xhwang@ciac.ac.cn; Fax: +86 431 85689095; Tel: +86 431 85262250

<sup>b</sup> University of Science and Technology of China, Hefei, Anhui 230026, People's Republic of China.

### **Contents**

|                                                                                                        |                |
|--------------------------------------------------------------------------------------------------------|----------------|
| <b>Synthesis of BDE and TDTD</b>                                                                       | <b>S2</b>      |
| <b>Synthesis of 4'-(3-hydroxypropyl)-[1,1'-biphenyl]-4-carbaldehyde</b>                                | <b>S2-S3</b>   |
| <b><sup>1</sup>H-NMR spectrum and mass spectrometry of BDE</b>                                         | <b>S4-S5</b>   |
| <b><sup>1</sup>H-NMR spectrum and mass spectrometry of TDTD</b>                                        | <b>S6-S7</b>   |
| <b><sup>1</sup>H-NMR and <sup>13</sup>C-NMR of 4'-(3-hydroxypropyl)-[1,1'-biphenyl]-4-carbaldehyde</b> | <b>S8-S9</b>   |
| <b><sup>1</sup>H-NMR spectrum, FT-IR and GPC of CO<sub>2</sub>-polyol</b>                              | <b>S10-S12</b> |
| <b>Synthetic protocols for all CPUDs</b>                                                               | <b>S13-S15</b> |
| <b>FT-IR spectrum for all CPUDs</b>                                                                    | <b>S16</b>     |
| <b>GPC traces and <sup>1</sup>H-NMR spectrum for all CPUDs</b>                                         | <b>S17-S22</b> |
| <b>Calculation equation of N<sup>+</sup> content</b>                                                   | <b>S23</b>     |
| <b>Photographs of CS plates coated with different CPUDs</b>                                            | <b>S24</b>     |

## Synthesis of BDE

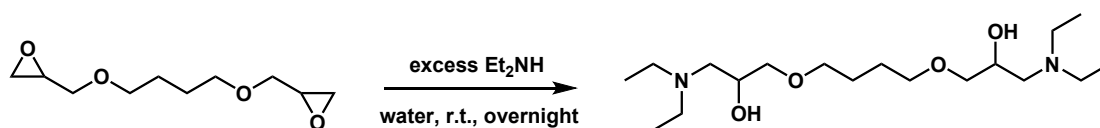

To a 250 ml single-neck round bottom flask with a magnetic stir bar was added 1,4-butanediol diglycidyl ether (16.18 g, 80 mmol), excess amount of diethylamine, and  $\text{H}_2\text{O}$  (30 ml), a yellow solution was formed upon vigorous stirring at room temperature overnight. The reaction process was monitored with thin layer chromatograph (TLC), when the 1,4-butanediol diglycidyl ether was consumed completely, another 30 ml of  $\text{H}_2\text{O}$  was added, after 10 min stirring the mixture was extracted with diethyl ether for three times (3 x 50 ml). The combined organic layer was dried over anhydrous  $\text{Na}_2\text{SO}_4$ , and the solvent was removed under reduced pressure to afford BDE. (Yield: 95%)

## Synthesis of TDTD

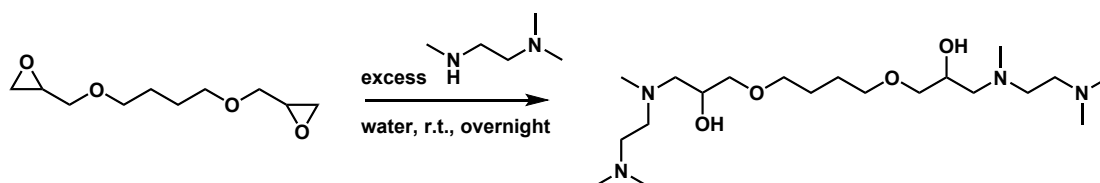

A similar synthesis process to BDE, the only difference is the remaining  $\text{N,N,N}'\text{-Trimethylethylenediamine}$  was removed by vacuum distillation. (Yield: 89%)

## Synthesis of 4'-(3-hydroxypropyl)-[1,1'-biphenyl]-4-carbaldehyde

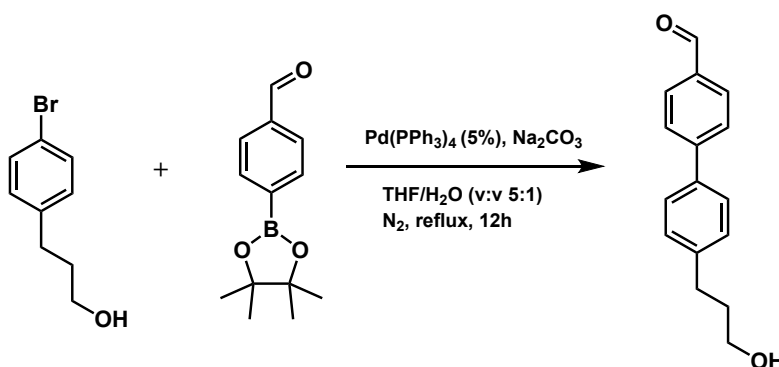

3-(4-bromophenyl)propan-1-ol (4.628 g, 21.52 mmol) and 4-(4,4,5,5-tetramethyl-1,3,2-dioxaborolan-2-yl)benzaldehyde (4.76 g, 20.50 mmol) as well as  $\text{Na}_2\text{CO}_3$  (22.81g, 215.2 mmol) were dissolved in 300 mL of tetrahydrofuran and 60ml  $\text{H}_2\text{O}$ . After the addition of tetrakis(triphenylphosphine)palladium (1.24g, 1.076mmol), the mixture was refluxed for 12 h.

When it was cooled to room temperature, the solution was extracted twice with dichloromethane ( $3 \times 50$  mL). The obtained organic layer was washed with plenty of water and the solvent was removed at reduced pressure. The residue was chromatographed on a silica gel column to give yellow solid with 77 % yield.

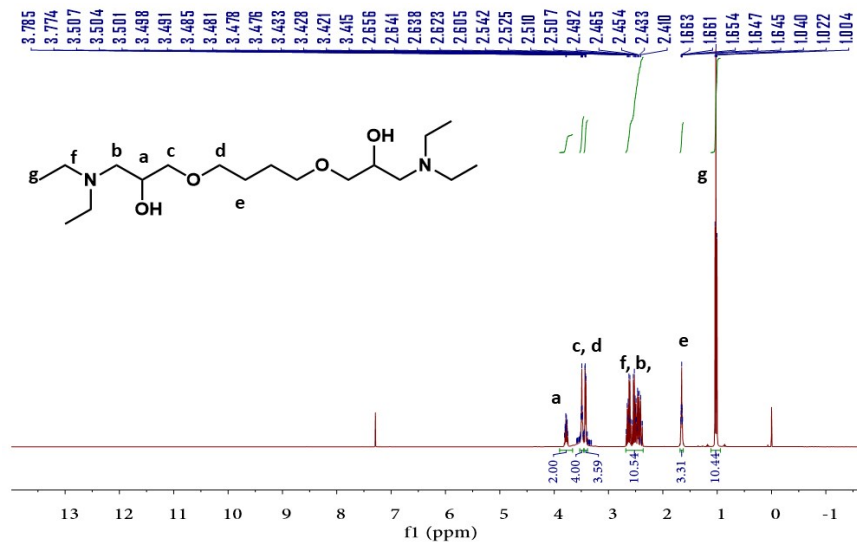

**Fig. S1** The <sup>1</sup>H-NMR spectrum of BDE in CDCl<sub>3</sub>.

20200818-1 106 (2.063) Cm (105:120-32:40)

Scan ES+  
8.27e7

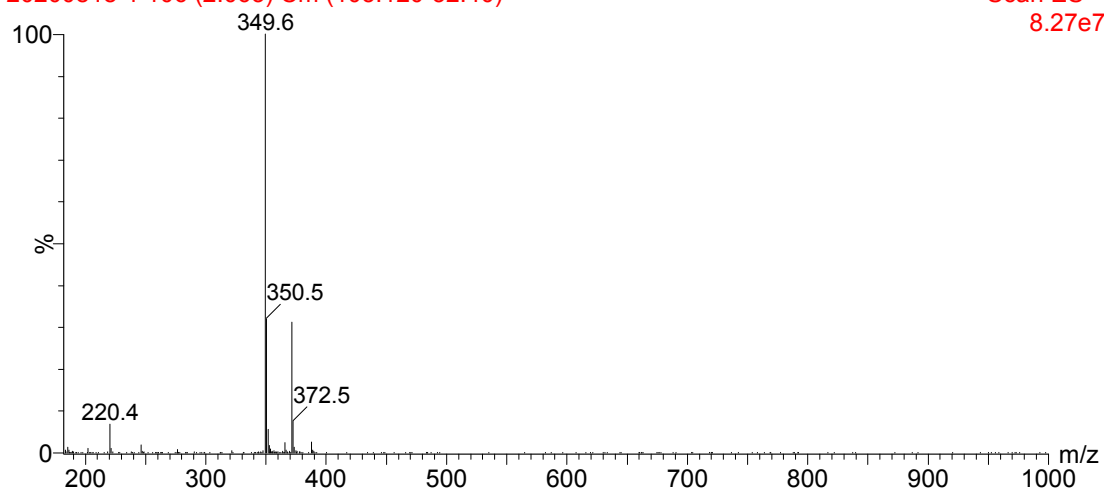

**Fig. S2** The mass spectrometry of BDE in positive mode.

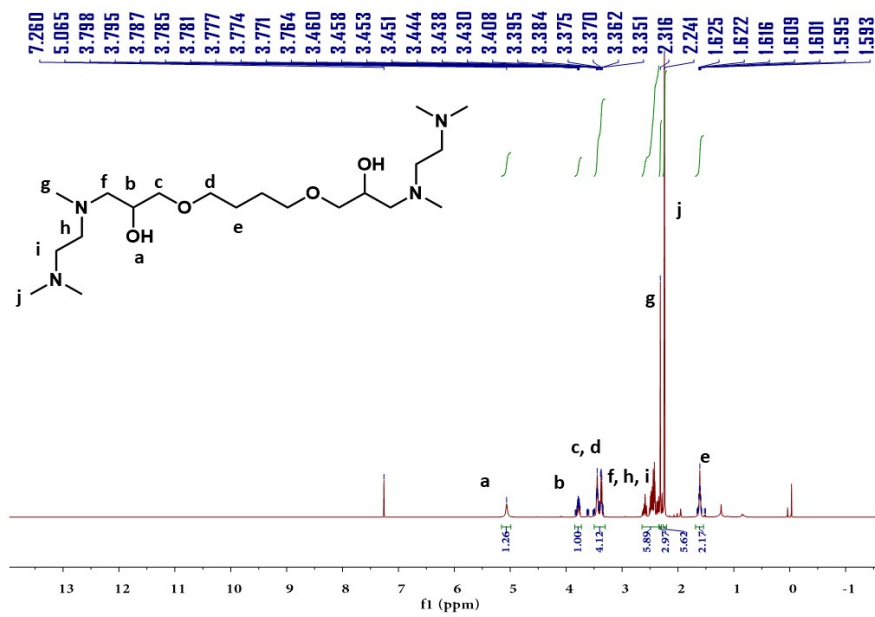

**Fig. S3** The <sup>1</sup>H-NMR spectrum of TDTD in CDCl<sub>3</sub>.

20200729\_pos\_200723152137 #2 RT: 0.00 AV: 1 NL: 2.39E7  
T: ITMS + c ESI Full ms [150.00-900.00]

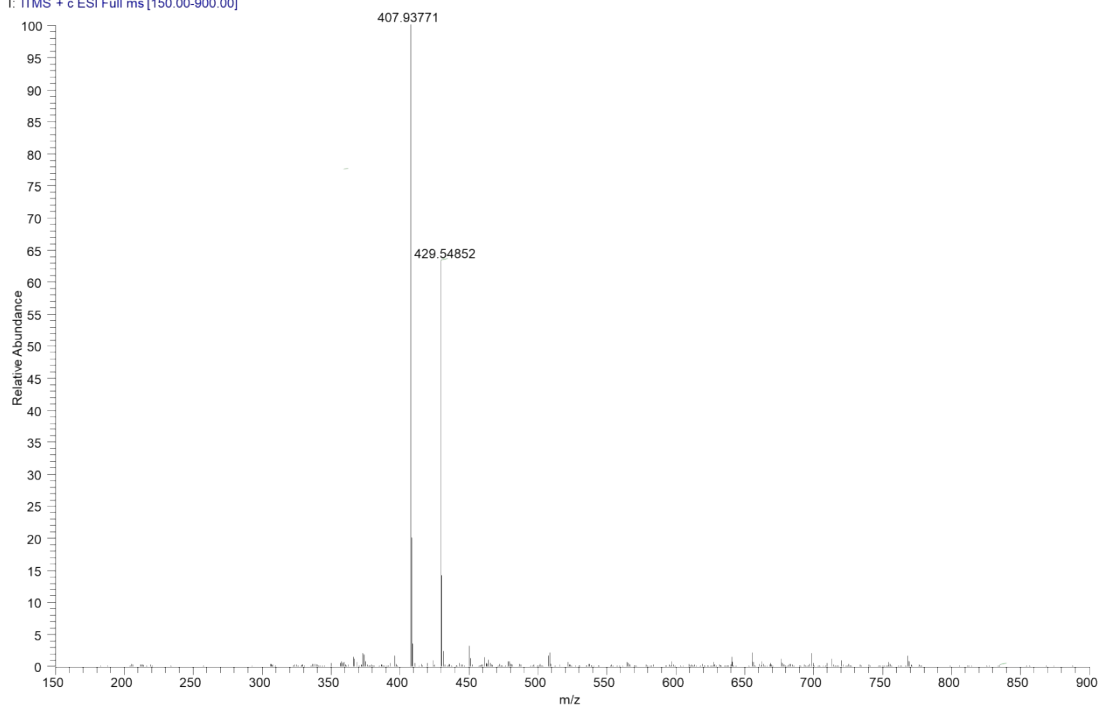

**Fig. S4** The mass spectrometry of TDTD in positive mode.

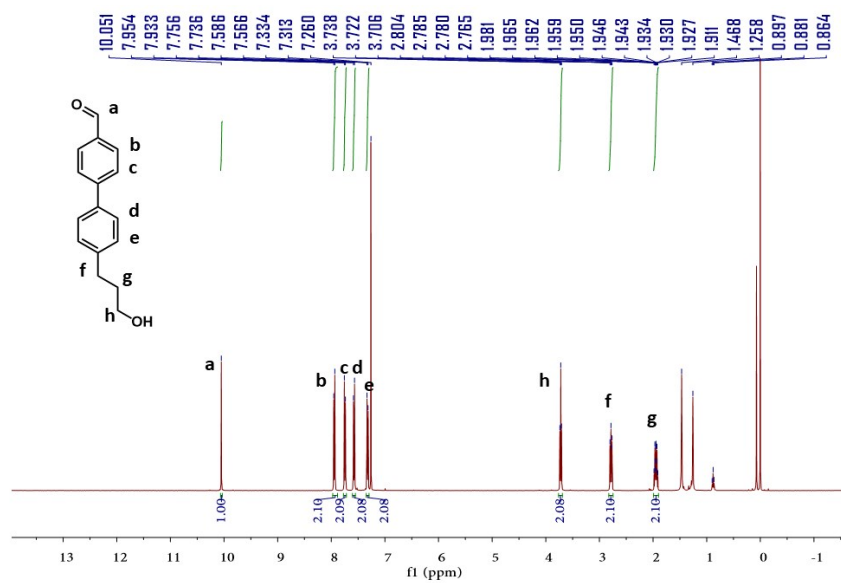

**Figure S5.** The <sup>1</sup>H-NMR spectrum of 4'-(3-hydroxypropyl)-[1,1'-biphenyl]-4-carbaldehyde in CDCl<sub>3</sub>.



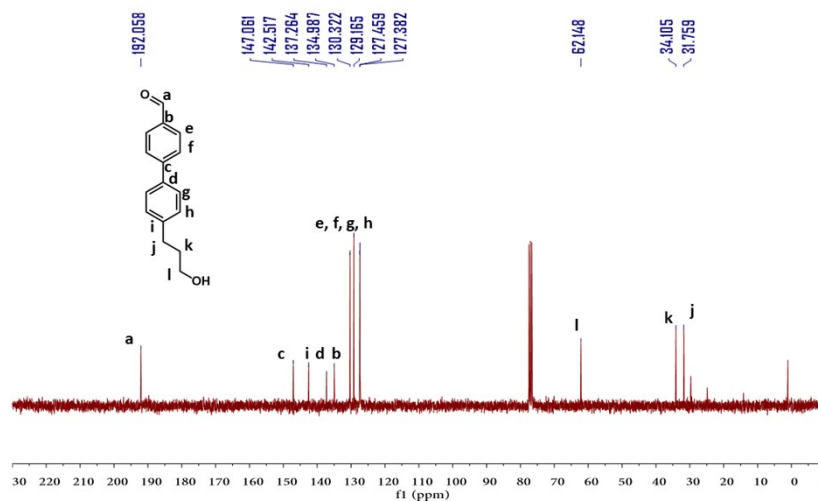

**Figure S6.** The <sup>13</sup>C-NMR spectrum of 4'-(3-hydroxypropyl)-[1,1'-biphenyl]-4-carbaldehyde in CDCl<sub>3</sub>.

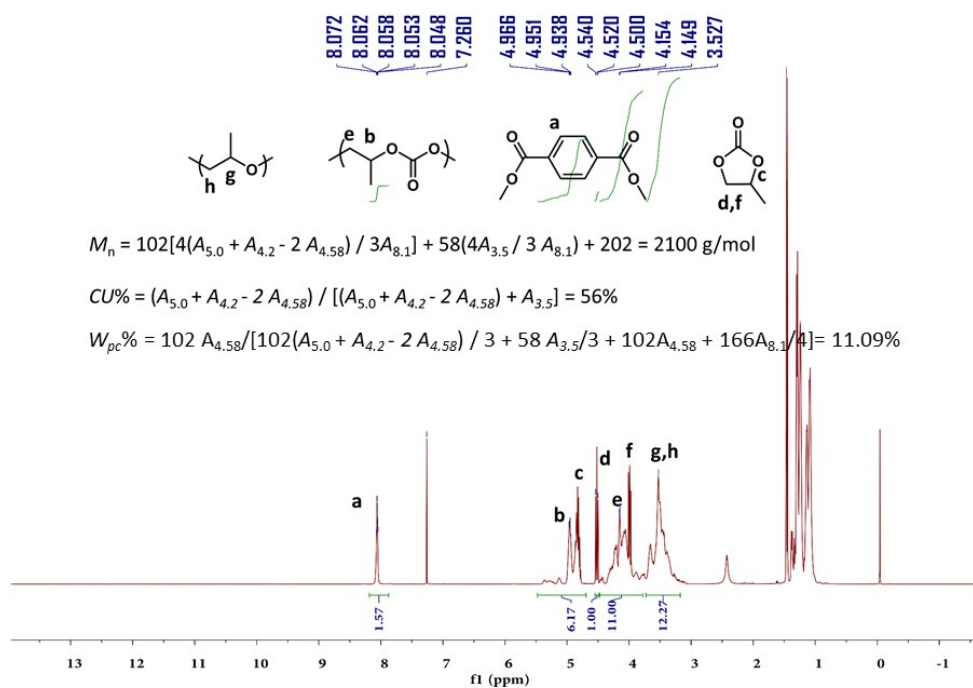

**Fig. S7** The  $^1\text{H-NMR}$  spectrum of  $\text{CO}_2$ -polyol in  $\text{CDCl}_3$ .

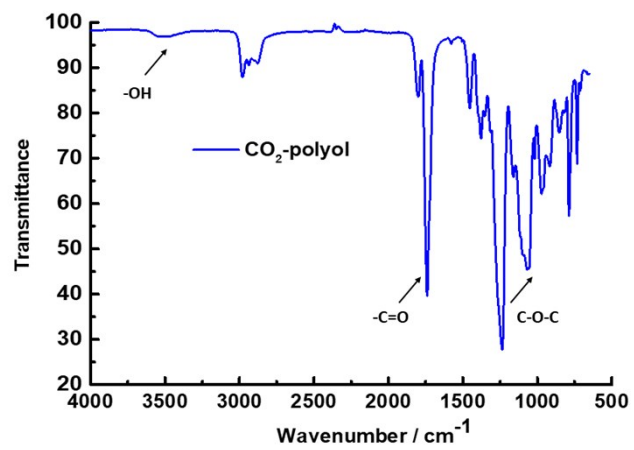

**Fig. S8** The FT-IR spectrum of CO<sub>2</sub>-polyol.

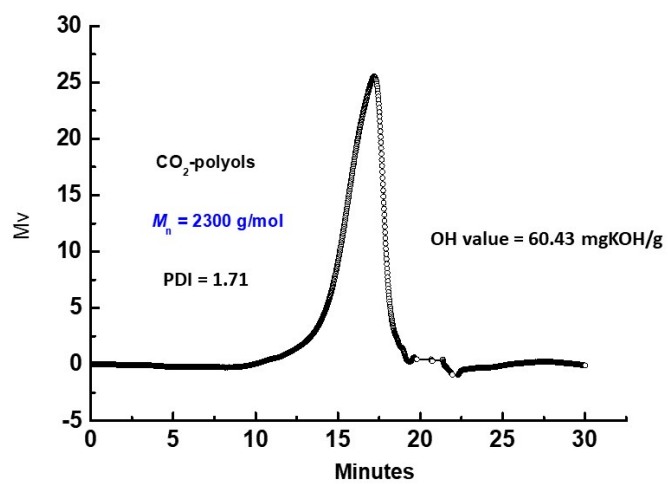

**Fig. S9** The GPC spectrum of CO<sub>2</sub>-polyol.

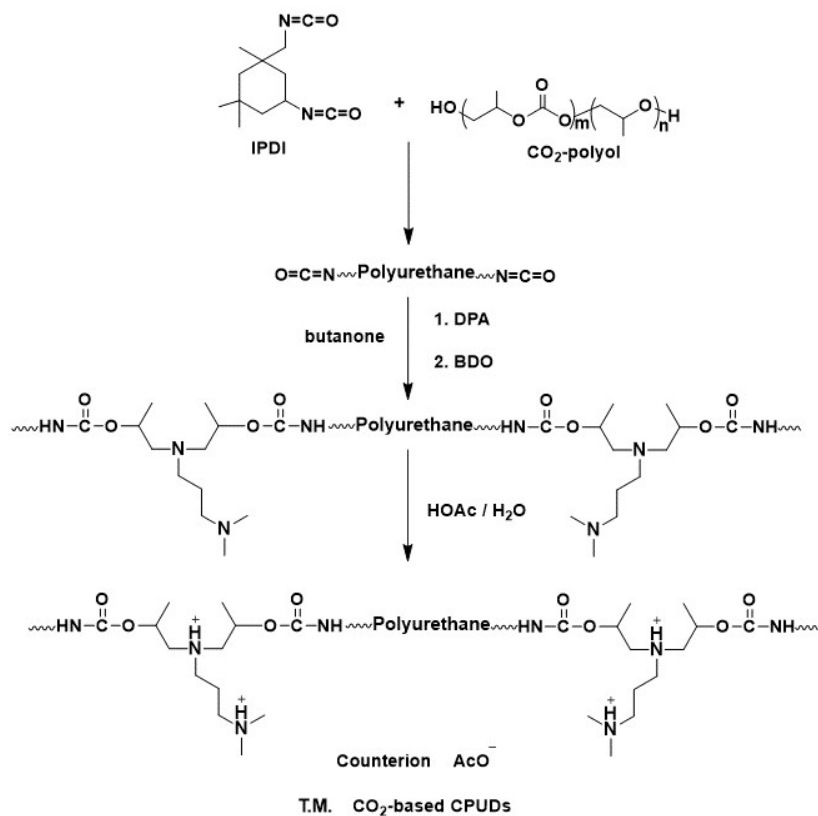

**Fig. S10** Synthetic route to prepare CPUD using DPA as internal emulsifier with different neutralization degree.

#### Synthesis of PPC-DPA-4

Synthesized using the same method as PPC-TDTD-4.

14.31 g of PPC-diol; 6.30 g of IPDI; 0.92 g of DPA; 1.58 g of BDO; 0.51 g of HOAc

#### Synthesis of PPC-DPA-4(1)

Synthesized using the same method as PPC-TDTD-4.

16.20 g of PPC-diol; 7.128 g of IPDI; 1.023 g of DPA; 1.79 g of BDO; 0.28 g of HOAc

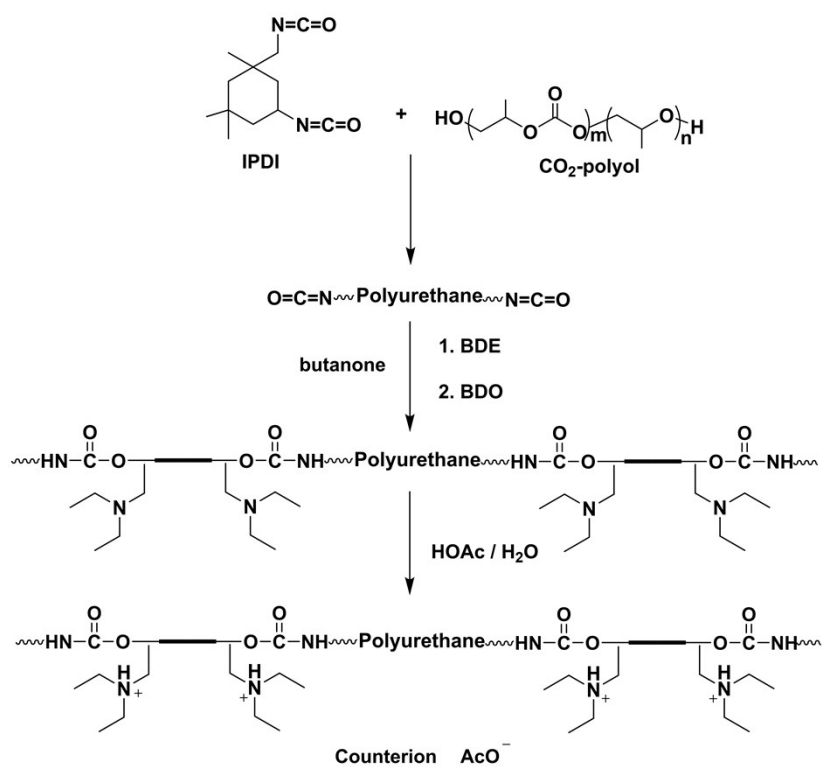

**Fig. S11** Synthetic route to prepare CPUD using BDE as internal emulsifier with different neutralization degree.

#### Synthesis of PPC-BDE-4

Synthesized using the same method as PPC-TDTD-4.

13.40 g of PPC-diol; 5.90 g of IPDI; 0.87 g of BDE; 1.62 g of BDO; 0.30 g of HOAc

#### Synthesis of PPC-BDE-4(1)

Synthesized using the same method as PPC-TDTD-4.

17.10 g of PPC-diol; 7.524 g of IPDI; 1.116 g of BDE; 2.06 g of BDO; 0.19 g of HOAc

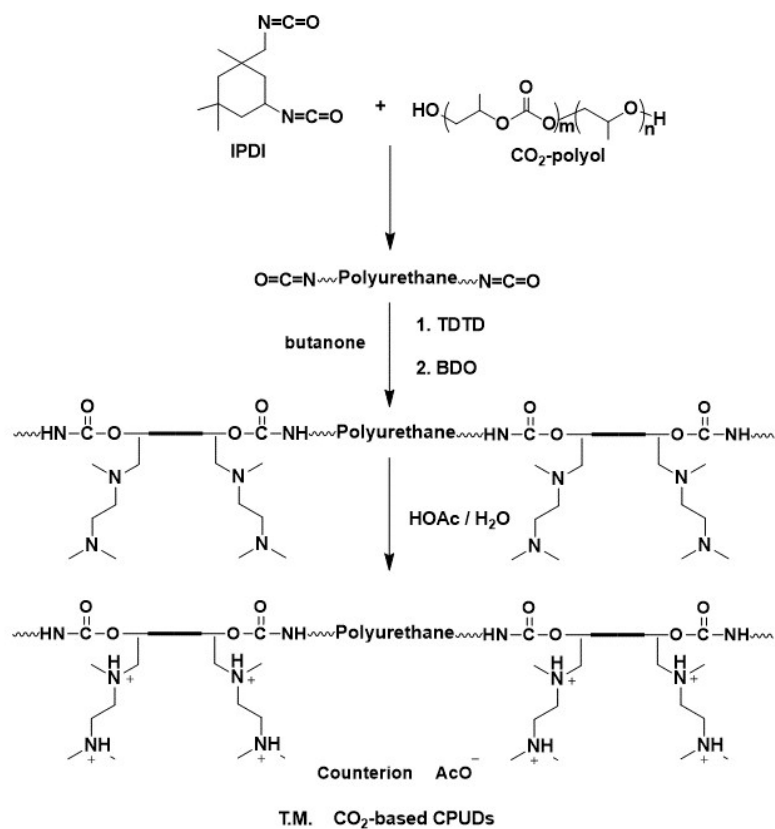

**Fig. S12** Synthetic route to prepare PPC-TDTD-4(1).

### Synthesis of PPC-TDTD-4(1)

Synthesized using the same method as PPC-TDTD-4.

20.10 g of PPC-diol; 8.84 g of IPDI; 1.30 g of TDTD; 2.47 g of BDO; 0.20 g of HOAc

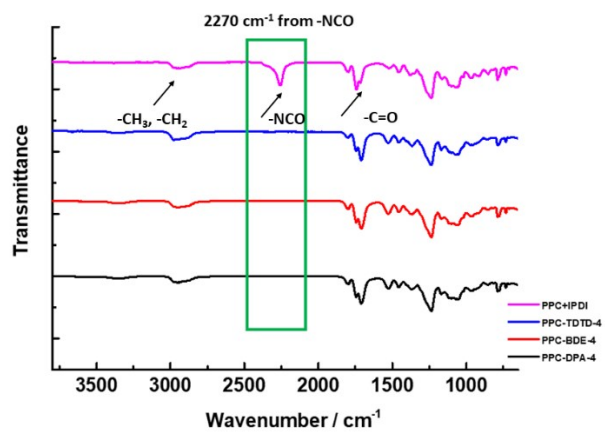

**Fig. S13** FT-IR spectrum for various CPUDs.





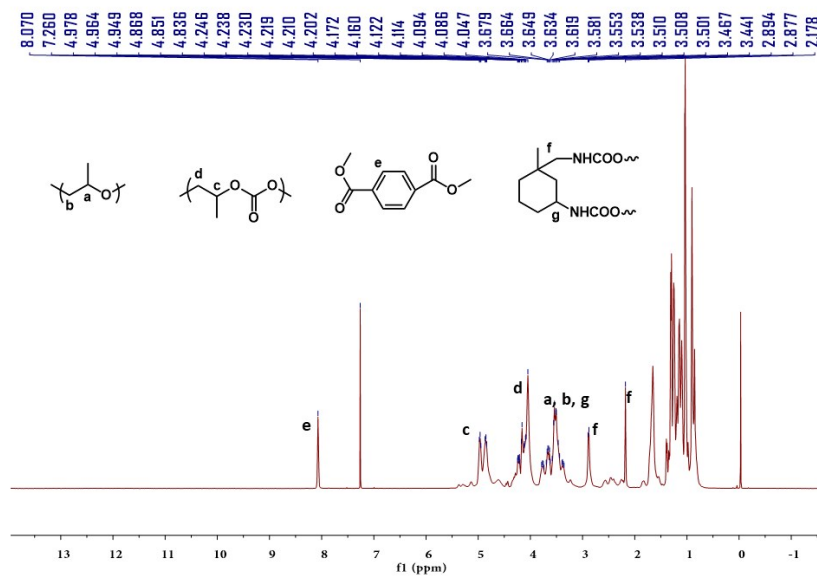

**Fig. S16** <sup>1</sup>H-NMR spectrum of PPC-DPA-4(1).

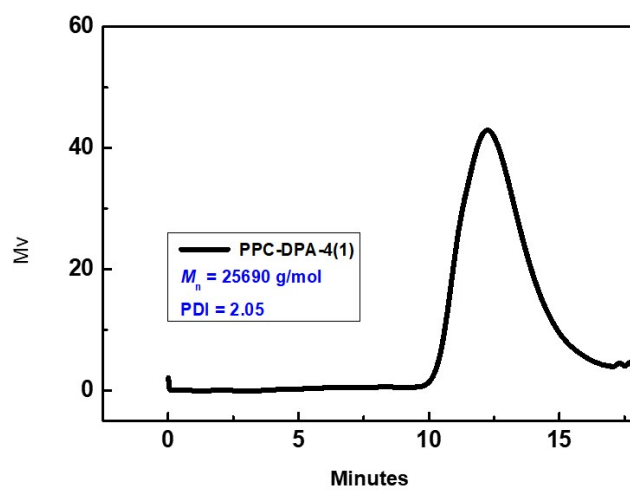

**Fig. S17** GPC traces of PPC-DPA-4(1).

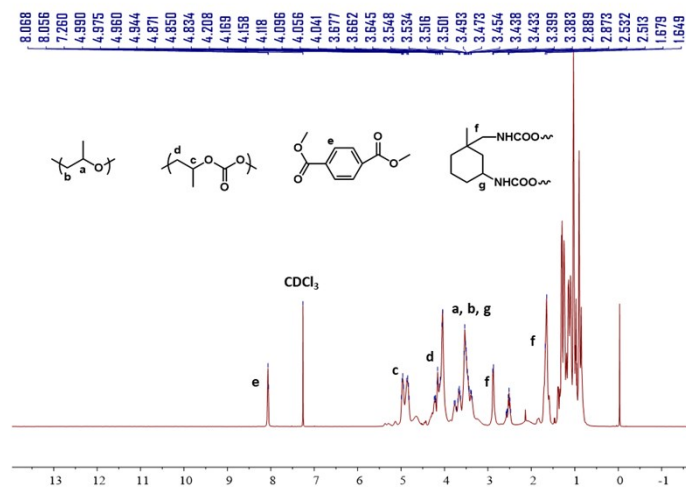

**Fig. S18** <sup>1</sup>H-NMR spectrum of PPC-BDE-4.

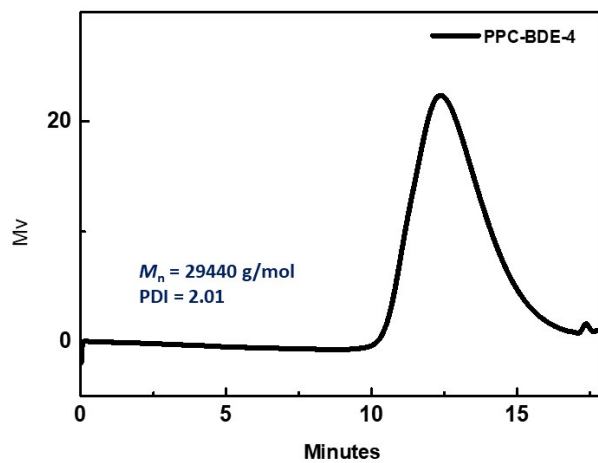

**Fig. S19** GPC traces of PPC-BDE-4.

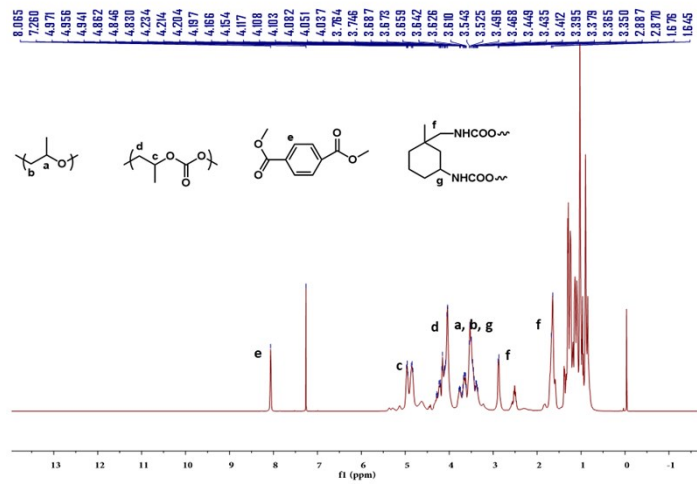

**Fig. S20** <sup>1</sup>H-NMR spectrum of PPC-BDE-4(1).

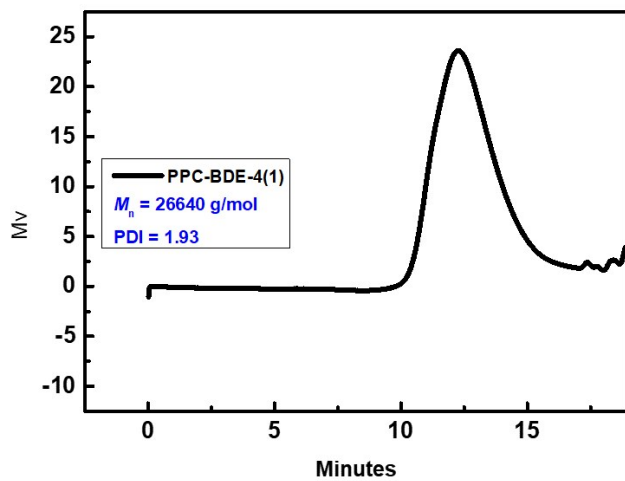

**Fig. S21** GPC traces of PPC-BDE-4(1).

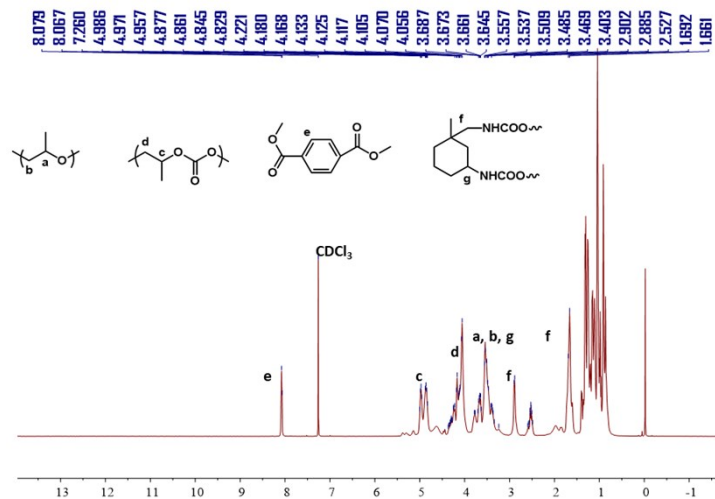

**Fig. S22**  $^1\text{H-NMR}$  spectrum of PPC-TDTD-4.

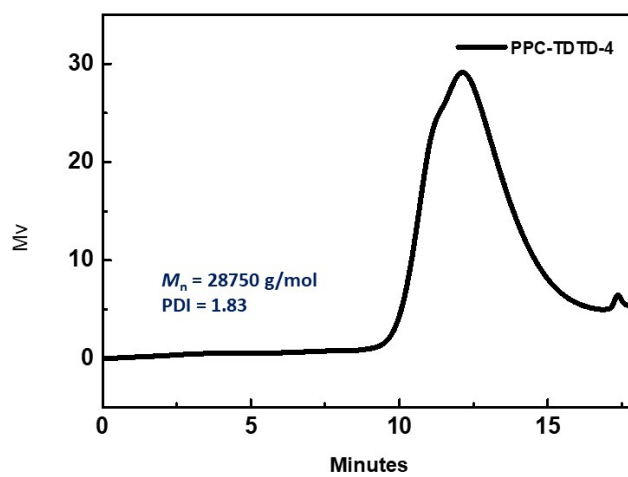

**Fig. S23** GPC traces of PPC-TDTD-4.

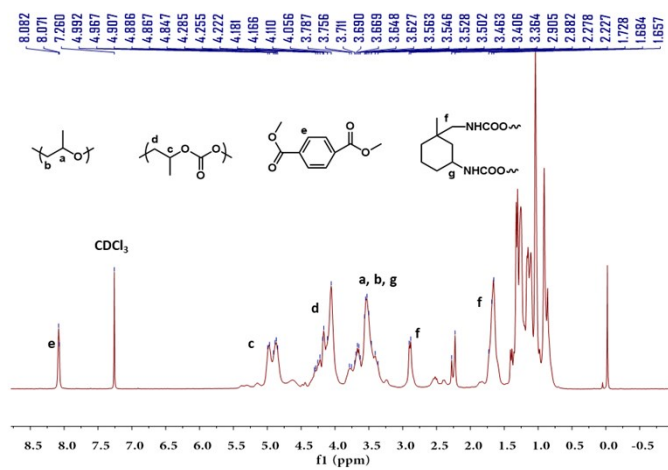

**Fig. S24** <sup>1</sup>H-NMR spectrum of PPC-TDTD-4(1).

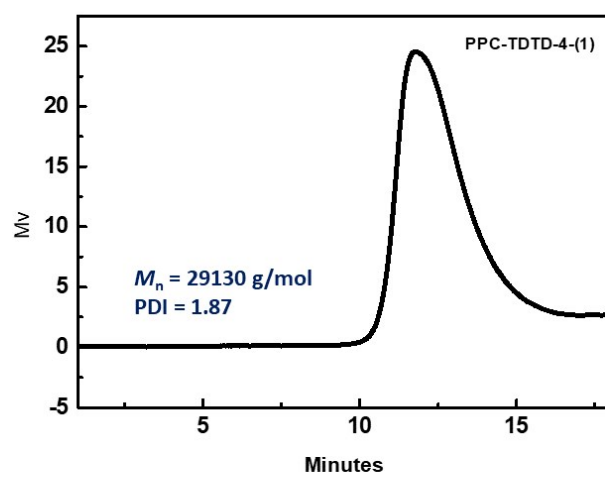

**Fig. S25** GPC traces of PPC-TDTD-4(1).

$$\text{Content (N}^+, \%) = \text{content of hydrophilic group (wt \%)} \times \frac{M(N)}{M(CE)} \times \frac{n(\text{HOAc})}{n}$$

M(N) means the sum of relative atomic mass of nitrogen in a molecule and M(CE) is the relative molecular mass of the corresponding chain extender, so the second term represents the mass fraction of nitrogen atoms; n(HOAc) refers to the actual molar amount of HOAc used in the preparation process and n is the theoretical molar amount of HOAc required under the assumption of 100% neutralization, therefore the third term represents the degree of neutralization.

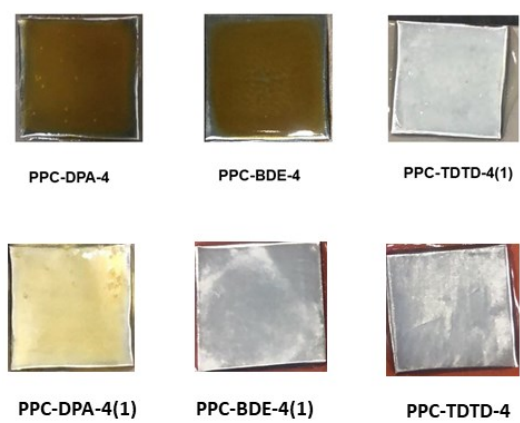

**Fig. S26** The photographs of CS plates coated with PPC-DPA-4, PPC-DPA-4(1), PPC-BDE-4, PPC-BDE-4(1), PPC-TDTD-4 and PPC-TDTD-4(1).
